# Supplementary material
Source: Elsevier journal article supplement (https://www.sciencedirect.com/science/article/pii/S0001651922000024)
Supplement: mmc1 [file S0001651922000024:mmc1.doc]

**Material y métodos**

**Diseño del estudio**

Se ha efectuado un estudio transversal de validación psicométrica al español de un cuestionario de calidad de vida en pacientes traqueostomizados6. El estudio se ha llevado a cabo en el Hospital Universitari Vall d’Hebron de Barcelona, y fue aprobado por el Comité Ético de Investigación Clínica del hospital (registro 432-2020).

**Proceso de validación del instrumento**

Tras la valoración del TQOL en su versión original6 por un comité de expertos en traqueostomía de nuestro hospital, se utilizó este instrumento como cuestionario base por su diseño y validez, previa autorización de sus autores. El cuestionario original se sometió a una traducción al español y retro-traducción por profesionales con elevado nivel de inglés, incluyendo un profesor de inglés nativo y bilingüe, así como un miembro del comité de expertos siguiendo las recomendaciones de traducción y validación de manuscritos médicos (8,13,16)**.** El comité de expertos, formado bajo el mismo criterio que el del cuestionario original6, indicó la idoneidad de añadir dos preguntas adicionales relacionadas con las afectaciones sensoriales del olfato y del gusto de estos pacientes, no contempladas en este cuestionario y muy poco citadas en la literatura. El instrumento final, denominado TQOL-versión española consta de 12 dimensiones y 22 ítems.

Para la utilización de un cuestionario en una población sociocultural distinta a la que va dirigida la versión original, no es suficiente su traducción literal, ya que no se puede mantener un nivel similar de fiabilidad y validez7. Por ello, se realizó su adaptación cultural al español del TQOL, para mantener su equivalencia semántica, conceptual y de contenido, con la versión original8.

Previo consentimiento informado se pasó el nuevo cuestionario a 7 pacientes con traqueostomía con edades comprendidas entre 55 a 76 años, y perfiles heterogéneos en cuanto a edad, profesión, estudios y con un buen nivel de conocimiento del español, para valorar la comprensión de las preguntas por si debía introducirse alguna modificación en el enunciado. No hubo cambios al respecto. El cuestionario definitivo se muestra en la Tabla 1.

Además del cuestionario específico de calidad de vida en el traqueostomizado de larga duración, a los pacientes se les preguntó por su calidad de vida mediante el cuestionario SF-36, cuestionario genérico de salud global ampliamente utilizado en los estudios de calidad de vida. Los dos cuestionarios se administraron y completaron a los 6 meses después de la traqueostomía (medición a los 6 meses). Con objeto de validar la repetitividad los cuestionarios se volvieron a administrar transcurridos entre 30 y 50 días, después de administrado el primer cuestionario (medición de validación) para observar si se habían producido cambios.
